# Supplementary material for: Mechanism of hydrogen evolution catalyzed by NiFe hydrogenases: insights from a Ni–Ru model compound
Source: Royal Society of Chemistry journal article supplement (doi:10.1039/b912690b), 2009-12-14
Supplement: b912690b.pdf [file b912690b.pdf]

## Supplementary Information

**Table S1.** Structural data for the intermediate species in the H<sub>2</sub>-evolving catalytic cycle of [Ni(xbsms)Ru(CO)<sub>2</sub>Cl<sub>2</sub>] (BP86 in DMF)

| Bond (Å)/angle (°)    | [NiRu] <sup>-</sup><br>(initial and<br>final steps) | [NiHRu]      | [NiHRu] <sup>-</sup> | [NiRu(H <sub>2</sub> )] | [NiRu] |
|-----------------------|-----------------------------------------------------|--------------|----------------------|-------------------------|--------|
| Ni-Ru                 | 2.733                                               | 2.934        | 2.823                | 2.982                   | 2.819  |
| Ru-H <sub>1</sub>     |                                                     | <b>1.614</b> | <b>1.629</b>         | <b>1.813</b>            |        |
| Ru-H <sub>2</sub>     |                                                     |              |                      | <b>1.700</b>            |        |
| Ni-H <sub>1</sub>     |                                                     | <b>2.342</b> | <b>1.951</b>         | <b>1.850</b>            |        |
| Ni-H <sub>1</sub> -Ru |                                                     | <b>93.9</b>  | <b>103.7</b>         | 109.0                   |        |
| Hinge<br>Ni-2S-Ru     | 97.9                                                | 106.7        | 101.0                | 110.0                   | 100.9  |
| Hinge<br>2S-Ni-2S     | 171.5                                               | 176.4        | 173.8                | 174.2                   | 174.2  |

**Table S2.** Mulliken spin densities for the intermediate species in the H<sub>2</sub>-evolving catalytic cycle of [Nixbsms)Ru(CO)<sub>2</sub>Cl<sub>2</sub>] (BP86 in DMF)

| Atom            | [NiRu] <sup>-</sup> | [NiHRu] | [NiHRu] <sup>-</sup> | [NiRu(H <sub>2</sub> )] | [NiRu] |
|-----------------|---------------------|---------|----------------------|-------------------------|--------|
| Ru              | <b>0.601</b>        | 0.0     | 0.015                | 0.027                   | 0.649  |
| Ni              | <b>-0.425</b>       | 0.0     | <b>-0.674</b>        | <b>-0.674</b>           | 0.124  |
| Cl <sub>2</sub> | 0.116               | 0.0     | 0.005                | 0.012                   | 0.143  |
| S <sub>1</sub>  | -0.080              | 0.0     | -0.104               | -0.111                  | 0.026  |
| S <sub>2</sub>  | -0.079              | 0.0     | -0.072               | -0.080                  | -0.002 |
| S <sub>3</sub>  | -0.079              | 0.0     | -0.072               | -0.080                  | -0.002 |
| S <sub>4</sub>  | -0.079              | 0.0     | -0.104               | -0.111                  | 0.025  |

**Table S3.** Atomic (ESP) charges for the intermediate species in the H<sub>2</sub>-evolving catalytic cycle of [Ni(xbsms)Ru(CO)<sub>2</sub>Cl<sub>2</sub>] (BP86 in DMF except for X-ray which was gas-phase optimized)

| Atom                            | [Ni(xbsms)Ru(CO) <sub>2</sub> Cl <sub>2</sub> ] | [NiRu] <sup>-</sup> | [NiHRu]       | [NiHRu] <sup>-</sup> | [NiRu(H <sub>2</sub> )] | [NiRu] |
|---------------------------------|-------------------------------------------------|---------------------|---------------|----------------------|-------------------------|--------|
| Ru                              | 0.108                                           | 0.720               | 0.462         | 0.680                | 0.031                   | 0.385  |
| Ni                              | 0.235                                           | 0.322               | 0.277         | 0.275                | 0.260                   | 0.320  |
| Cl <sub>1</sub>                 | -0.467                                          |                     |               |                      |                         |        |
| Cl <sub>2</sub>                 | -0.406                                          | -0.806              | -0.717        | -0.816               | -0.530                  | -0.707 |
| H <sub>1</sub>                  |                                                 |                     | <b>-0.209</b> | <b>-0.274</b>        | <b>-0.323</b>           |        |
| H <sub>2</sub>                  |                                                 |                     |               |                      | <b>0.845</b>            |        |
| S <sub>1</sub>                  | -0.162                                          | -0.503              | -0.272        | -0.446               | -0.387                  | -0.298 |
| S <sub>2</sub>                  | -0.112                                          | -0.317              | -0.183        | -0.272               | -0.277                  | -0.206 |
| S <sub>3</sub>                  | -0.113                                          | -0.316              | -0.182        | -0.274               | -0.279                  | -0.207 |
| S <sub>4</sub>                  | -0.163                                          | -0.493              | -0.276        | -0.452               | -0.395                  | -0.288 |
| Total 4S                        | -0.550                                          | -1.629              | -0.913        | -1.443               | -1.338                  | -0.998 |
| C <sub>21</sub> O <sub>21</sub> | 0.058                                           | -0.270              | -0.092        | -0.189               | 0.063                   | -0.132 |
| C <sub>22</sub> O <sub>22</sub> | 0.058                                           | -0.270              | -0.090        | -0.190               | 0.060                   | -0.132 |

**Table S4.** Mayer bond orders for the intermediate species in the H<sub>2</sub>-evolving catalytic cycle of [Ni(xbsms)Ru(CO)<sub>2</sub>Cl<sub>2</sub>] (BP86 in DMF except for X-ray which was gas-phase optimized)

| Atoms                            | [Ni(xbsms)Ru(CO) <sub>2</sub> Cl <sub>2</sub> ] | [NiRu] <sup>-</sup> | [NiHRu] | [NiHRu] <sup>-</sup> | [NiRu(H <sub>2</sub> )] | [NiRu] |
|----------------------------------|-------------------------------------------------|---------------------|---------|----------------------|-------------------------|--------|
| Ru-H <sub>1</sub>                |                                                 |                     | 0.697   | 0.617                | 0.464                   |        |
| Ru-H <sub>2</sub>                |                                                 |                     |         |                      | 0.312                   |        |
| Ni-H                             |                                                 |                     | 0.126   | 0.262                |                         |        |
| Ru-Cl <sub>1</sub>               | 0.083                                           |                     |         |                      |                         |        |
| H <sub>1</sub> -H <sub>2</sub>   |                                                 |                     |         |                      | 0.374                   |        |
| Ru-C <sub>21</sub>               | 1.257                                           | 1.428               | 1.313   | 1.371                | 1.192                   | 1.359  |
| Ru-C <sub>22</sub>               | 1.258                                           | 1.430               | 1.314   | 1.371                | 1.190                   | 1.360  |
| Ru-Cl <sub>2</sub>               | 0.807                                           | 0.364               | 0.462   | 0.394                | 0.611                   | 0.457  |
| Ru-S <sub>1</sub>                | 0.626                                           | 0.593               | 0.616   | 0.636                | 0.681                   | 0.596  |
| Ru-S <sub>4</sub>                | 0.627                                           | 0.594               | 0.612   | 0.635                | 0.683                   | 0.599  |
| Ni-S <sub>1</sub>                | 1.050                                           | 0.775               | 1.023   | 0.735                | 0.770                   | 1.054  |
| Ni-S <sub>4</sub>                | 1.052                                           | 0.776               | 1.025   | 0.729                | 0.772                   | 1.055  |
| Ni-S <sub>2</sub>                | 0.916                                           | 0.696               | 0.930   | 0.752                | 0.757                   | 0.896  |
| Ni-S <sub>3</sub>                | 0.915                                           | 0.704               | 0.929   | 0.755                | 0.759                   | 0.899  |
| C <sub>21</sub> -O <sub>21</sub> | 2.546                                           | 2.347               | 2.471   | 2.408                | 2.558                   | 2.414  |
| C <sub>22</sub> -O <sub>22</sub> | 2.546                                           | 2.349               | 2.471   | 2.407                | 2.560                   | 2.414  |

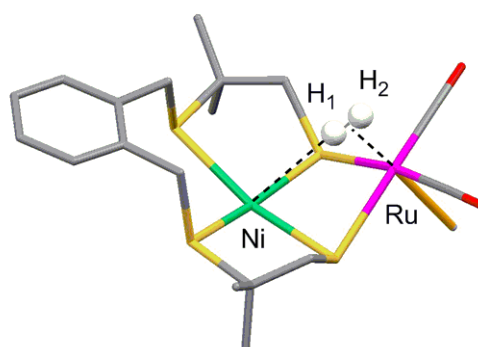

**Figure S1.** Molecular structure of [NiRu(H<sub>2</sub>)]. The nickel atom is depicted in green, ruthenium in magenta, chloride in orange and sulfurs in yellow.
